# Supplementary material for: Time to get moving: assisted gene flow of forest trees
Source: PubMed Central journal article supplement (PMC4780373; doi:10.1111/eva.12293), 2015-08-24
Supplement: EVA-9-271-s001.pdf [file EVA-9-271-s001.pdf]

**Supplementary Table 1.**

Regressions of population mean height vs. provenance mean annual temperature (MAT) and vs. mean summer precipitation (MSP).

Variable definitions: m = standardized regression slope; n\_pops = number of populations; n\_families = number of open-pollinated families per population, if known; n\_individs = number of individuals per population, if known; age = age of trees when height was measured; study area = geographic origin of provenances.

| Species                      | MAT                     |                |                   | MSP                          |                |                   | n_pops | n_families     | n_individs | Age | Study area*                                                                   | Reference              |
|------------------------------|-------------------------|----------------|-------------------|------------------------------|----------------|-------------------|--------|----------------|------------|-----|-------------------------------------------------------------------------------|------------------------|
|                              | m (%·°C <sup>-1</sup> ) | R <sup>2</sup> | p                 | m (%·(100mm) <sup>-1</sup> ) | R <sup>2</sup> | p                 |        |                |            |     |                                                                               |                        |
| <i>Abies concolor</i>        | <b>4.7</b>              | <b>0.28</b>    | <b>0.0422</b>     | 9.3                          | 0.15           | 0.1567            | 15     | 3 to 100       | –          | 8   | Southern Rockies                                                              | Wright et al. 1971     |
| <i>Abies grandis</i>         | <b>7.5</b>              | <b>0.60</b>    | <b>&lt;0.0001</b> | 4.0                          | 0.02           | 0.4845            | 22     | –              | –          | 15  | BC & Central Coasts                                                           | König 1995             |
| <i>Abies grandis</i>         | -0.1                    | 0.00           | 0.9743            | 2.5                          | 0.04           | 0.3762            | 21     | 15 to 25       | c. 270     | 10  | Central Coast                                                                 | Xie and Ying 1993      |
| <i>Abies lasiocarpa</i>      | <b>1.7</b>              | <b>0.32</b>    | <b>0.0295</b>     | -3.2                         | 0.19           | 0.1046            | 15     | –              | c. 155†    | 3   | Alaska & Central Coasts; Boreal; Northern, Central & Southern Rockies         | Hansen et al. 2004     |
| <i>Abies procera</i>         | -2.6                    | 0.14           | 0.1509            | 2.1                          | 0.02           | 0.5591            | 16     | –              | 43 to 56   | 10  | Central Coast                                                                 | Xie and Ying 1994      |
| <i>Cornus nuttallii</i>      | <b>3.9</b>              | <b>0.51</b>    | <b>0.0315</b>     | -5.4                         | 0.25           | 0.1718            | 9      | 3 to 20        | 12 to 169  | 1   | BC, Central & Southern Coasts                                                 | Keir et al. 2011       |
| <i>Picea engelmannii</i>     | <b>3.5</b>              | <b>0.19</b>    | <b>&lt;0.0001</b> | -3.3                         | 0.02           | 0.1855            | 103    | bulk           | 27†        | 2   | Central & Southern Rockies; Intermountain                                     | Rehfeldt 1994          |
| <i>Picea pungens</i>         | <b>3.6</b>              | <b>0.32</b>    | <b>&lt;0.0001</b> | <b>12.8</b>                  | <b>0.28</b>    | <b>0.0007</b>     | 38     | c. 7           | –          | 7   | Central & Southern Rockies                                                    | Bongarten 1978         |
| <i>Picea sitchensis</i>      | <b>13.4</b>             | <b>0.85</b>    | <b>&lt;0.0001</b> | <b>-8.6</b>                  | <b>0.48</b>    | <b>0.0022</b>     | 17     | 10 to 13; bulk | 30 to 124  | 3   | Alaska, BC & Central Coasts                                                   | Mimura and Aitken 2007 |
| <i>Picea sitchensis</i>      | <b>6.9</b>              | <b>0.89</b>    | <b>&lt;0.0001</b> | -2.6                         | 0.24           | 0.1507            | 10     | –              | 79 to 81   | 20  | Alaska, BC & Central Coasts                                                   | Ying 1997              |
| <i>Pinus albicaulis</i>      | 2.7                     | 0.02           | 0.5461            | 3.9                          | 0.02           | 0.4576            | 25     | 3 to 17        | 15 to 89   | 3   | BC & Central Coasts; Sierra Nevada; Central Rockies; Intermountain            | Bower and Aitken 2008  |
| <i>Pinus attenuata</i>       | <b>7.4</b>              | <b>0.30</b>    | <b>0.0007</b>     | <b>-17.2</b>                 | <b>0.37</b>    | <b>0.0002</b>     | 32     | 5 to 6; –      | 9 to 27    | 8   | Central & Southern Coasts; Sierra Nevada                                      | Brown and Doran 1985   |
| <i>Pinus contorta</i>        | 1.7                     | 0.06           | 0.2592            | -1.9                         | 0.01           | 0.6668            | 23     | –              | –          | 15  | Northern, Central & Southern Rockies; Western Great Plains                    | Dow et al. 1998        |
| <i>Pinus contorta</i>        | <b>2.6</b>              | <b>0.52</b>    | <b>&lt;0.0001</b> | 0.0                          | 0.00           | 0.9767            | 54     | –              | –          | 20  | Alaska & BC Coasts; Boreal; Northern Rockies; Intermountain                   | Illingworth 1978       |
| <i>Pinus monticola</i>       | 0.6                     | 0.00           | 0.6415            | <b>10.3</b>                  | <b>0.28</b>    | <b>&lt;0.0001</b> | 60     | ≥ 5            | 30†        | 3   | BC & Central Coasts; Sierra Nevada; Northern & Central Rockies; Intermountain | Rehfeldt et al. 1984   |
| <i>Pinus ponderosa</i>       | 1.0                     | 0.06           | 0.3377            | 2.2                          | 0.05           | 0.3805            | 17     | –              | 36†        | 16  | Central Coast; Northern Rockies; Intermountain                                | Enricci et al. 2000    |
| <i>Pinus ponderosa</i>       | <b>5.1</b>              | <b>0.27</b>    | <b>&lt;0.0001</b> | <b>11.3</b>                  | <b>0.11</b>    | <b>0.0049</b>     | 72     | 7 to 17        | c. 100     | 3   | Southern Rockies; Western Great Plains                                        | Read 1980              |
| <i>Populus trichocarpa</i>   | <b>8.7</b>              | <b>0.49</b>    | <b>&lt;0.0001</b> | 0.8                          | 0.00           | 0.6460            | 97     | 3 to 7‡        | 3 to 7‡    | 4   | Alaska, BC & Central Coasts; Boreal; Northern Rockies                         | McKown et al. 2013     |
| <i>Pseudotsuga menziesii</i> | 5.1                     | 0.13           | 0.0962            | -12.7                        | 0.15           | 0.0700            | 23     | 10             | c. 78      | 2   | Central & Southern Coasts; Sierra Nevada                                      | Sweet 1965             |
| <i>Pseudotsuga menziesii</i> | 0.5                     | 0.09           | 0.3231            | 1.0                          | 0.09           | 0.3116            | 13     | 14 to 89       | 25†        | 25  | BC & Central Coasts                                                           | White and Ching 1985   |
| <i>Quercus garryana</i>      | 1.8                     | 0.04           | 0.5019            | -17.7                        | 0.30           | 0.0551            | 13     | 9 to 13        | 108 to 156 | 2   | BC & Central Coasts; Sierra Nevada                                            | Huebert 2009           |
| <i>Thuja plicata</i>         | <b>1.9</b>              | <b>0.30</b>    | <b>0.0148</b>     | -1.0                         | 0.05           | 0.3533            | 19     | 5; bulk        | 90 to 450† | 3   | BC Coast; Northern & Central Rockies                                          | Cherry 1995            |
| <i>Tsuga heterophylla</i>    | <b>2.2</b>              | <b>0.21</b>    | <b>0.0354</b>     | <b>-2.5</b>                  | <b>0.21</b>    | <b>0.0385</b>     | 21     | 2; bulk        | 96 to 192  | 1   | Alaska, BC & Central Coasts; Northern & Central Rockies                       | Kuser and Ching 1981   |

\* Study area definitions:

**Alaska Coast** – southern Alaska and Alaska panhandle, including adjacent coastal mountains in British Columbia and the Yukon

**BC Coast** – coastal British Columbia

**Central Coast** – coastal Washington, Oregon, and northern California; Cascade Mountains

**South Coast**, coastal California south of San Francisco

**Sierra Nevada** – Sierra Nevada; inland California

**Boreal** – interior northern Alberta, British Columbia and the Yukon

**Northern Rockies** – Canadian Rockies; interior southern British Columbia

**Central Rockies** – Rocky Mountains in Idaho, Montana, and Wyoming

**Southern Rockies** – Rocky Mountains in Arizona, Colorado, New Mexico, and Utah

**Intermountain** – Great Basin; interior Oregon and Washington

**Western Great Plains** – foothills east of the Rocky Mountains, in Canada and the United States

† Estimate before accounting for mortality.

‡ Number of distinct clonal genotypes.

**Supplementary Table 2.**

Regressions of population mean timing of spring events vs. provenance mean annual temperature (MAT) and vs. mean summer precipitation (MSP).

Variable definitions: m = standardized regression slope; n\_pops = number of populations; n\_families = number of open-pollinated families per population, if known; n\_individs = number of individuals per population, if known; age = age of trees when height was measured; study area = geographic origin of provenances.

| Species                      | MAT                     |                |                   | MSP                          |                |               | n_pops | n_families     | n_individs | Age | Event     | Study area*                                                        | Reference               |
|------------------------------|-------------------------|----------------|-------------------|------------------------------|----------------|---------------|--------|----------------|------------|-----|-----------|--------------------------------------------------------------------|-------------------------|
|                              | m (d·°C <sup>-1</sup> ) | R <sup>2</sup> | p                 | m (d·(100mm) <sup>-1</sup> ) | R <sup>2</sup> | p             |        |                |            |     |           |                                                                    |                         |
| <i>Alnus rubra</i>           | <b>0.7</b>              | <b>0.40</b>    | <b>0.0263</b>     | <b>-0.5</b>                  | <b>0.58</b>    | <b>0.0038</b> | 12     | –              | 28†        | 3   | bud flush | Alaska, BC & Central Coasts; Central Rockies                       | Cannell et al. 1987     |
| <i>Alnus rubra</i>           | <b>1.1</b>              | <b>0.29</b>    | <b>&lt;0.0001</b> | -0.1                         | 0.01           | 0.4549        | 55     | –              | 100        | 2   | bud flush | BC Coast                                                           | Hamann et al. 1998      |
| <i>Picea engelmannii</i>     | 0.1                     | 0.01           | 0.3160            | 0.3                          | 0.03           | 0.1045        | 103    | bulk           | 27†        | 2   | bud flush | Central & Southern Rockies; Intermountain                          | Rehfeldt 1994           |
| <i>Picea pungens</i>         | -0.1                    | 0.01           | 0.6441            | <b>-1.8</b>                  | <b>0.19</b>    | <b>0.0091</b> | 36     | c. 7           | –          | 7   | bud flush | Central and Southern Rockies                                       | Bongarten 1978          |
| <i>Picea sitchensis</i>      | 0.3                     | 0.08           | 0.2589            | -0.2                         | 0.04           | 0.4402        | 17     | 10 to 13; bulk | 30 to 124  | 2   | bud flush | Alaska, BC & Central Coasts                                        | Mimura and Aitken 2007  |
| <i>Pinus albicaulis</i>      | <b>2.7</b>              | <b>0.46</b>    | <b>0.0002</b>     | <b>-2.1</b>                  | <b>0.18</b>    | <b>0.0331</b> | 25     | 3 to 17        | 15 to 89   | 3   | bud flush | BC & Central Coasts; Sierra Nevada; Central Rockies; Intermountain | Bower and Aitken 2008   |
| <i>Populus trichocarpa</i>   | -0.6                    | 0.02           | 0.1396            | <b>1.8</b>                   | <b>0.10</b>    | <b>0.0016</b> | 97     | 3 to 7‡        | 3 to 7‡    | 3   | bud flush | Alaska, BC & Central Coasts; Boreal; Northern Rockies              | McKown et al. 2013      |
| <i>Pseudotsuga menziesii</i> | <b>-5.1</b>             | <b>0.54</b>    | <b>0.0027</b>     | -0.5                         | 0.00           | 0.8808        | 14     | –              | –          | –   | bud flush | Northern Rockies                                                   | Lavadinović et al. 2013 |
| <i>Pseudotsuga menziesii</i> | -1.1                    | 0.10           | 0.1379            | 2.9                          | 0.14           | 0.0843        | 23     | 10             | 45         | 2   | bud flush | Central & Southern Coasts; Sierra Nevada                           | Sweet 1965              |
| <i>Pseudotsuga menziesii</i> | <b>-0.9</b>             | <b>0.26</b>    | <b>0.0425</b>     | 1.2                          | 0.18           | 0.1061        | 16     | –              | 98†        | 7   | bud flush | BC & Central Coasts                                                | White et al. 1979       |
| <i>Tsuga heterophylla</i>    | <b>4.6</b>              | <b>0.82</b>    | <b>&lt;0.0001</b> | 0.3                          | 0.00           | 0.8515        | 14     | 3; bulk        | 40 to 120† | 2   | bud flush | Alaska, BC & Central Coasts; Northern & Central Rockies            | Kuser 1980              |

\* Study area definitions:

**Alaska Coast** – southern Alaska and Alaska panhandle, including adjacent coastal mountains in British Columbia and the Yukon

**BC Coast** – coastal British Columbia

**Central Coast** – coastal Washington, Oregon, and northern California; Cascade Mountains

**South Coast**, coastal California south of San Francisco

**Sierra Nevada** – Sierra Nevada; inland California

**Boreal** – interior northern Alberta, British Columbia and the Yukon

**Northern Rockies** – Canadian Rockies; interior southern British Columbia

**Central Rockies** – Rocky Mountains in Idaho, Montana, and Wyoming

**Southern Rockies** – Rocky Mountains in Arizona, Colorado, New Mexico, and Utah

**Intermountain** – Great Basin; interior Oregon and Washington

**Western Great Plains** – foothills east of the Rocky Mountains, in Canada and the United States

† Estimate before accounting for mortality.

‡ Number of distinct clonal genotypes.

**Supplementary Table 3.**

Regressions of population mean timing of fall events vs. provenance mean annual temperature (MAT) and vs. mean summer precipitation (MSP).

Variable definitions: m = standardized regression slope; n\_pops = number of populations; n\_families = number of open-pollinated families per population, if known; n\_individs = number of individuals per population, if known; age = age of trees when height was measured; study area = geographic origin of provenances.

| Species                    | MAT                     |                |         | MSP                          |                |        | n_pops | n_families     | n_individs | Age | Event              | Study area*                                             | Reference              |
|----------------------------|-------------------------|----------------|---------|------------------------------|----------------|--------|--------|----------------|------------|-----|--------------------|---------------------------------------------------------|------------------------|
|                            | m (d·°C <sup>-1</sup> ) | R <sup>2</sup> | p       | m (d·(100mm) <sup>-1</sup> ) | R <sup>2</sup> | p      |        |                |            |     |                    |                                                         |                        |
| <i>Alnus rubra</i>         | 4.8                     | 0.69           | 0.0008  | -2.7                         | 0.66           | 0.0012 | 12     | –              | 44†        |     | 2 bud set          | Alaska, BC & Central Coasts; Central Rockies            | Cannell et al. 1987    |
| <i>Alnus rubra</i>         | 2.7                     | 0.45           | <0.0001 | -0.7                         | 0.13           | 0.0077 | 55     | –              | 100        |     | 1 leaf abscission  | BC Coast                                                | Hamann et al. 1998     |
| <i>Picea engelmannii</i>   | 0.9                     | 0.25           | <0.0001 | -0.1                         | 0.00           | 0.8297 | 102    | bulk           | 27†        |     | 2 growth cessation | Central & Southern Rockies; Intermountain               | Rehfeldt 1994          |
| <i>Picea sitchensis</i>    | 11.4                    | 0.87           | <0.0001 | -7.1                         | 0.47           | 0.0024 | 17     | 10 to 13; bulk | 30 to 124  |     | 2 bud set          | Alaska, BC & Central Coasts                             | Mimura and Aitken 2007 |
| <i>Populus trichocarpa</i> | 10.6                    | 0.62           | <0.0001 | -0.5                         | 0.00           | 0.7806 | 97     | 3 to 7‡        | 3 to 7‡    |     | 2 bud set          | Alaska, BC & Central Coasts; Boreal; Northern Rockies   | McKown et al. 2013     |
| <i>Tsuga heterophylla</i>  | 7.5                     | 0.90           | <0.0001 | -4.9                         | 0.29           | 0.0179 | 19     | 3; bulk        | 40 to 120† |     | 1 bud set          | Alaska, BC & Central Coasts; Northern & Central Rockies | Kuser 1980             |

\* Study area definitions:

**Alaska Coast** – southern Alaska and Alaska panhandle, including adjacent coastal mountains in British Columbia and the Yukon

**BC Coast** – coastal British Columbia

**Central Coast** – coastal Washington, Oregon, and northern California; Cascade Mountains

**South Coast**, coastal California south of San Francisco

**Sierra Nevada** – Sierra Nevada; inland California

**Boreal** – interior northern Alberta, British Columbia and the Yukon

**Northern Rockies** – Canadian Rockies; interior southern British Columbia

**Central Rockies** – Rocky Mountains in Idaho, Montana, and Wyoming

**Southern Rockies** – Rocky Mountains in Arizona, Colorado, New Mexico, and Utah

**Intermountain** – Great Basin; interior Oregon and Washington

**Western Great Plains** – foothills east of the Rocky Mountains, in Canada and the United States

† Estimate before accounting for mortality.

‡ Number of distinct clonal genotypes.

**Supplementary Figure 1.** Adaptive clines in height growth potential along a precipitation gradient are relatively uncommon and inconsistent. (A) Regression slopes of standardized height growth potential vs. provenance mean summer precipitation, for populations grown in a common test environment. Each line represents an independent provenance trial, and line type corresponds to the species and reference indicated in the legend. Only statistically significant regression slopes are shown ( $p < 0.05$ ). (B) The climatic scope of provenance-trial datasets compared to the species realized niche. For each species, the bottom line represents the core climatic niche (solid black line) and full climatic niche (dashed extension) in mean July precipitation (MJP) (see text; Thompson et al. 2000). The upper lines represent the range of provenance MJP values among populations within each provenance trial for that species. Open circles represent the MJP at the test site(s) for each provenance trial. Provenance trials missing an open circle were grown in a controlled environment. Note that the x-axis scale in (B) does not cover the full range of data for some species; this scaling was applied to increase visibility for the majority of species.

**Supplementary Figure 2.** Height growth potential vs. provenance mean annual temperature from provenance trials in western North American tree species (Part I: continued in Supp. Fig. 3). Each box represents an independent provenance trial, and each point represents a single population. Slopes are depicted for statistically significant regressions ( $p < 0.05$ ). Species abbreviations consist of the first four letters of the genus, plus the last two letters of the specific epithet (see Fig. 4 for full names). Scale is not comparable among boxes; axes were rescaled independently for maximum visibility of the spread of data.

**Supplementary Figure 3.** Height growth potential vs. provenance mean annual temperature from provenance trials in western North American tree species (Part II: continued from Supp. Fig. 2). Each box represents an independent provenance trial, and each point represents a single population. Slopes are depicted for statistically significant regressions ( $p < 0.05$ ). Species abbreviations consist of the first four letters of the genus, plus the last two letters of the specific epithet (see Fig. 4 for full names). Scale is not comparable among boxes; axes were rescaled independently for maximum visibility of the spread of data.

**Supplementary Figure 4.** Height growth potential vs. provenance mean summer precipitation from provenance trials in western North American tree species (Part I: continued in Supp. Fig. 5). Each box represents an independent provenance trial, and each point represents a single population. Slopes are depicted for statistically significant regressions ( $p < 0.05$ ). Species abbreviations consist of the first four letters of the genus, plus the last two letters of the specific epithet (see Fig. 4 for full names). Scale is not comparable among boxes; axes were rescaled independently for maximum visibility of the spread of data.

**Supplementary Figure 5.** Height growth potential vs. provenance mean summer precipitation from provenance trials in western North American tree species (Part II: continued from Supp. Fig. 4). Each box represents an independent provenance trial,

and each point represents a single population. Slopes are depicted for statistically significant regressions ( $p < 0.05$ ). Species abbreviations consist of the first four letters of the genus, plus the last two letters of the specific epithet (see Fig. 4 for full names). Scale is not comparable among boxes; axes were rescaled independently for maximum visibility of the spread of data.

**Supplementary Figure 6.** Date of spring events (see text) vs. provenance mean annual temperature from provenance trials in western North American tree species. Each box represents an independent provenance trial, and each point represents a single population. Slopes are depicted for statistically significant regressions ( $p < 0.05$ ). Species abbreviations consist of the first four letters of the genus, plus the last two letters of the specific epithet (see Fig. 4 for full names). Scale is not comparable among boxes; axes were rescaled independently for maximum visibility of the spread of data.

**Supplementary Figure 7.** Date of spring events (see text) vs. provenance mean summer precipitation from provenance trials in western North American tree species. Each box represents an independent provenance trial, and each point represents a single population. Slopes are depicted for statistically significant regressions ( $p < 0.05$ ). Species abbreviations consist of the first four letters of the genus, plus the last two letters of the specific epithet (see Fig. 4 for full names). Scale is not comparable among boxes; axes were rescaled independently for maximum visibility of the spread of data.

**Supplementary Figure 8.** Date of fall events (see text) vs. provenance mean annual temperature from provenance trials in western North American tree species. Each box represents an independent provenance trial, and each point represents a single population. Slopes are depicted for statistically significant regressions ( $p < 0.05$ ). Species abbreviations consist of the first four letters of the genus, plus the last two letters of the specific epithet (see Fig. 4 for full names). Scale is not comparable among boxes; axes were rescaled independently for maximum visibility of the spread of data.

**Supplementary Figure 9.** Date of fall events (see text) vs. provenance mean summer precipitation from provenance trials in western North American tree species. Each box represents an independent provenance trial, and each point represents a single population. Slopes are depicted for statistically significant regressions ( $p < 0.05$ ). Species abbreviations consist of the first four letters of the genus, plus the last two letters of the specific epithet (see Fig. 4 for full names). Scale is not comparable among boxes; axes were rescaled independently for maximum visibility of the spread of data.

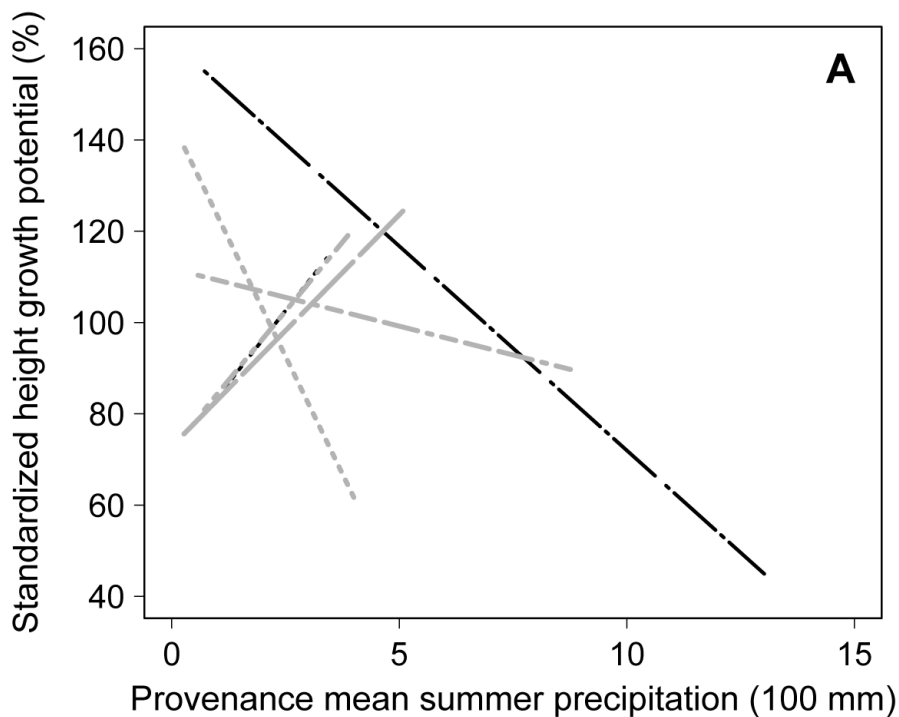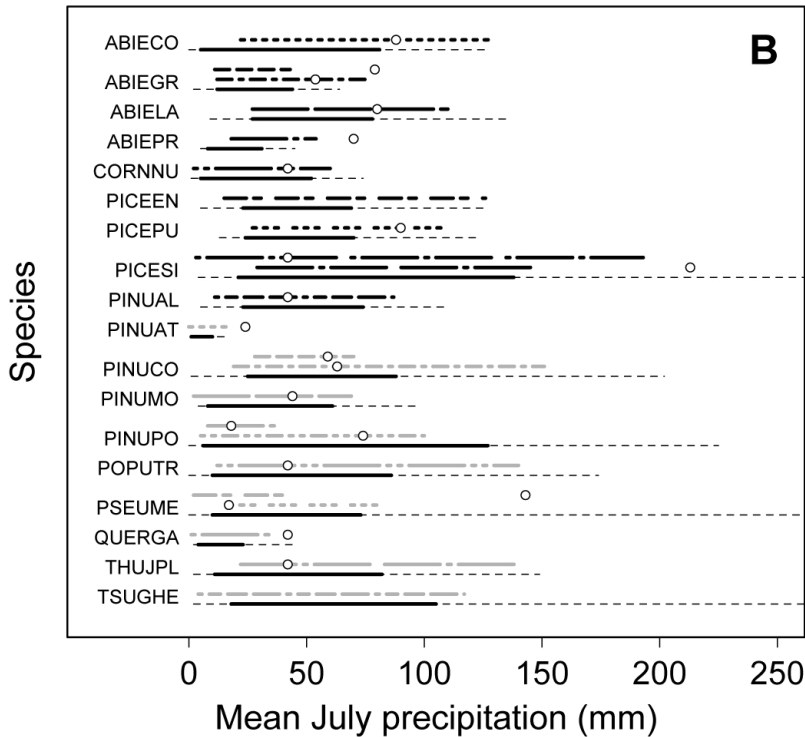

*Abies concolor* ..... Wright et al. 1971

*Abies grandis* ..... König 1995  
..... Xie and Ying 1993

*Abies lasiocarpa* ..... Hansen et al. 2004

*Abies procera* ..... Xie and Ying 1994

*Cornus nuttallii* ..... Keir et al. 2011

*Picea engelmannii* ..... Rehfeldt 1994

*Picea pungens* ..... Bongarten 1978

*Picea sitchensis* ..... Mimura and Aitken 2007  
..... Ying 1997

*Pinus albicaulis* ..... Bower and Aitken 2008

*Pinus attenuata* ..... Brown and Doran 1985

*Pinus contorta* ..... Dow et al. 1998  
..... Illingworth 1978

*Pinus monticola* ..... Rehfeldt et al. 1984

*Pinus ponderosa* ..... Enricci et al. 2000  
..... Read 1980

*Populus trichocarpa* ..... McKown et al. 2013

*Pseudotsuga menziesii* ..... Sweet 1965  
..... White and Ching 1985

*Quercus garryana* ..... Huebert 2009

*Thuja plicata* ..... Cherry 1995

*Tsuga heterophylla* ..... Kuser and Ching 1981

Supplementary Figure 1

Standardized height growth potential (%)

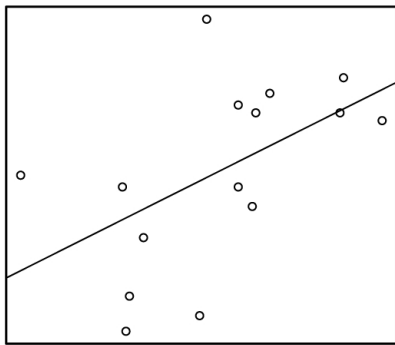

ABIECO (Wright et al. 1971)

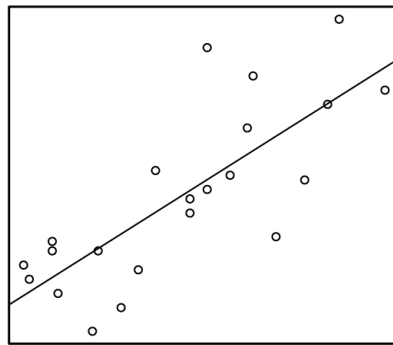

ABIEGR (König 1995)

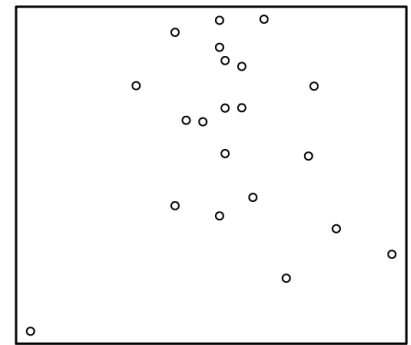

ABIEGR (Xie and Ying 1993)

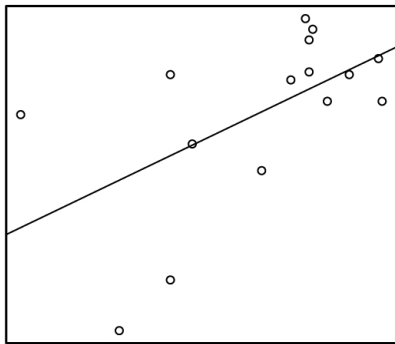

ABIELA (Hansen et al. 2004)

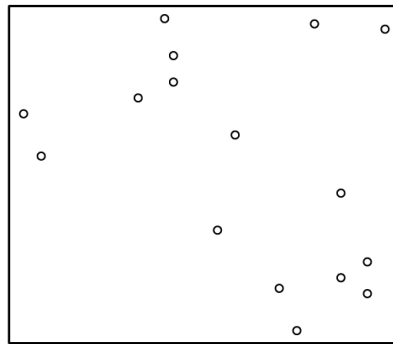

ABIEPR (Xie and Ying 1994)

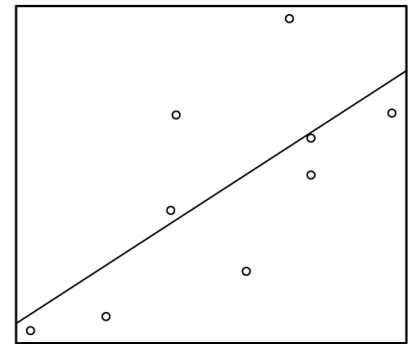

CORNNU (Keir et al. 2011)

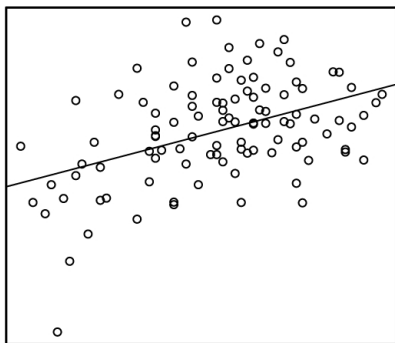

PICEEN (Rehfeldt 1994)

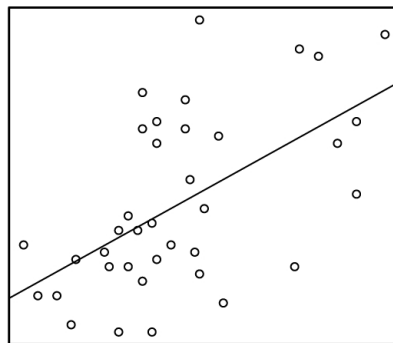

PICEPU (Bongarten 1978)

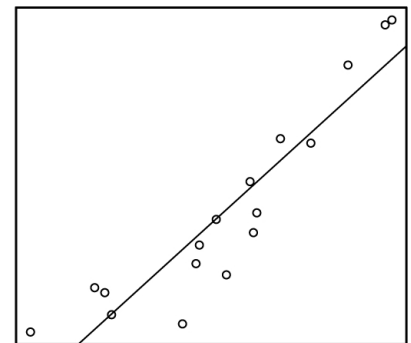

PICESI (Mimura and Aitken 2007)

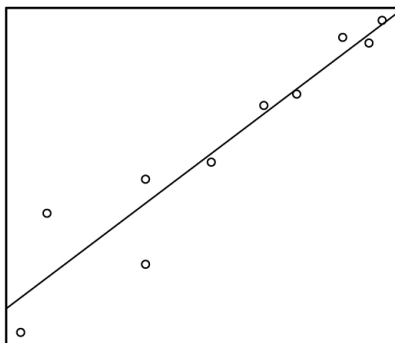

PICESI (Ying 1997)

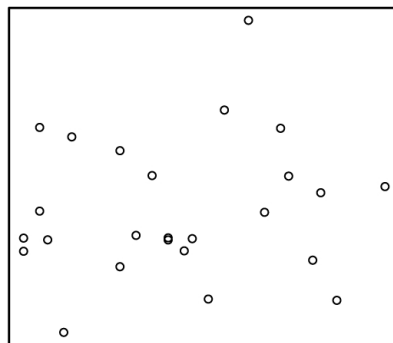

PINUAL (Bower and Aitken 2008)

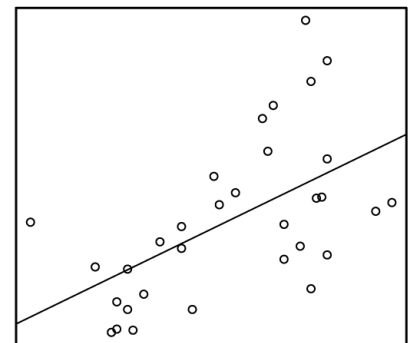

PINUAT (Brown and Doran 1985)

Provenance mean annual temperature (°C)

Standardized height growth potential (%)

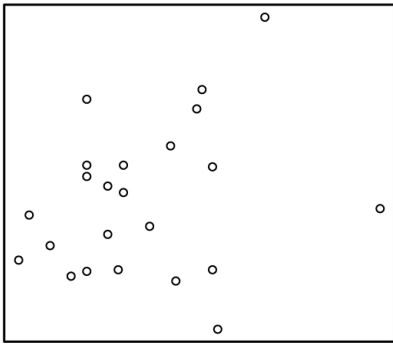

PINUCO (Dow et al. 1998)

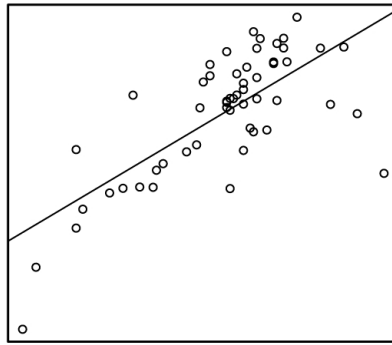

PINUCO (Illingworth 1978)

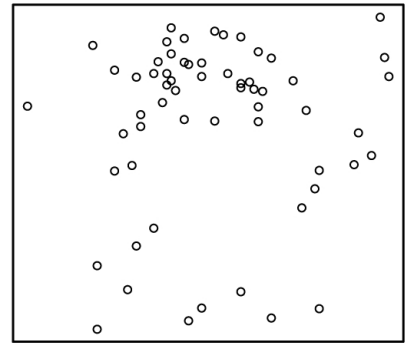

PINUMO (Rehfeldt et al. 1984)

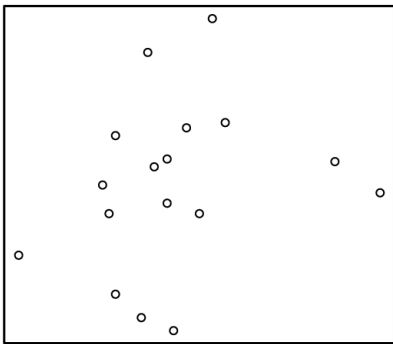

PINUPO (Enricci et al. 2000)

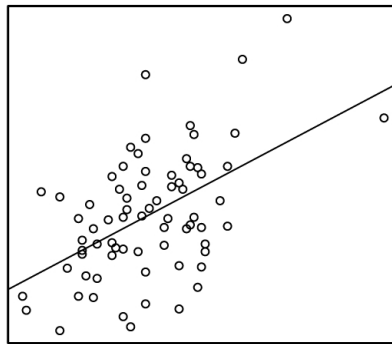

PINUPO (Read 1980)

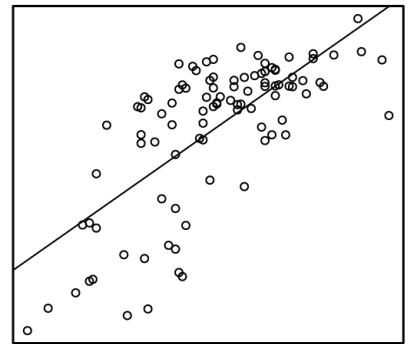

POPUTR (McKown et al. 2013)

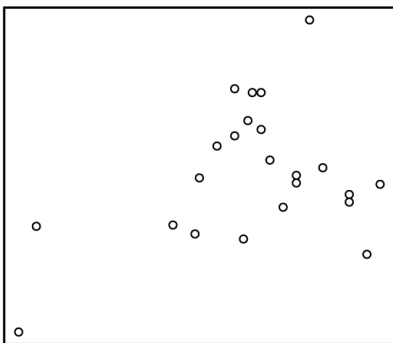

PSEUME (Sweet 1965)

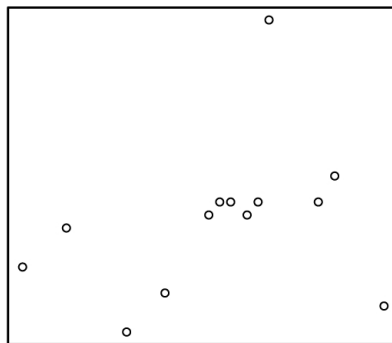

PSEUME (White and Ching 1985)

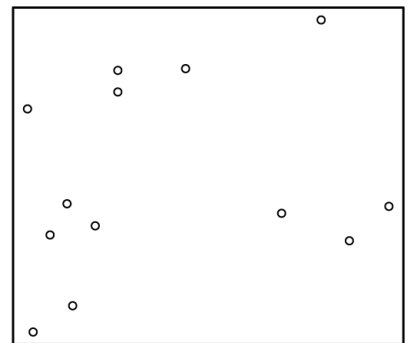

QUERGA (Huebert 2009)

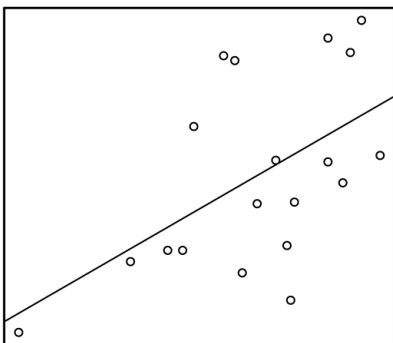

THUJPL (Cherry 1995)

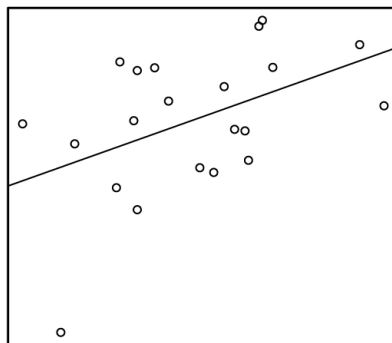

TSUGHE (Kuser and Ching 1981)

Provenance mean annual temperature (°C)



Standardized height growth potential (%)

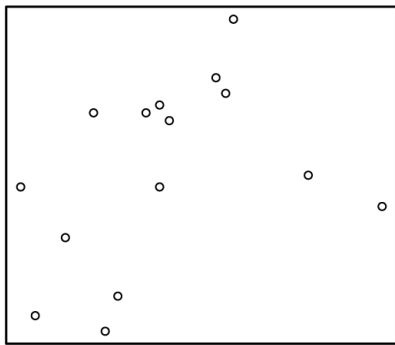

ABIECO (Wright et al. 1971)

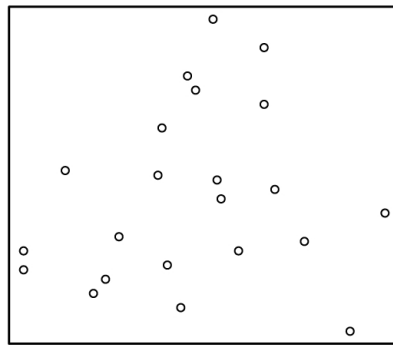

ABIEGR (König 1995)

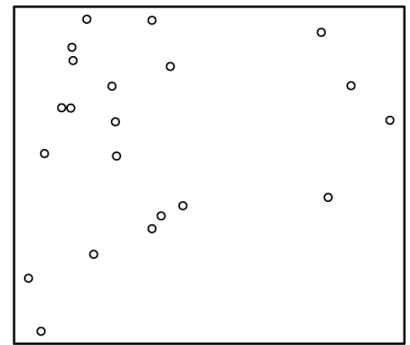

ABIEGR (Xie and Ying 1993)

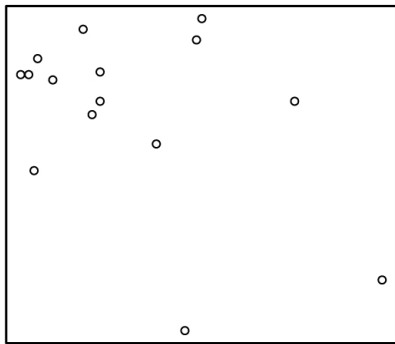

ABIELA (Hansen et al. 2004)

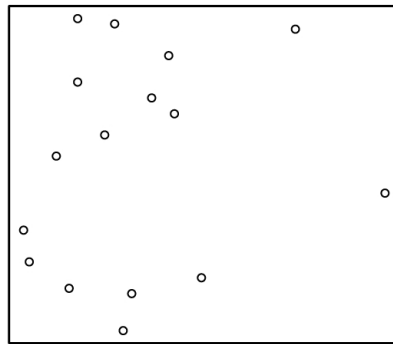

ABIEPR (Xie and Ying 1994)

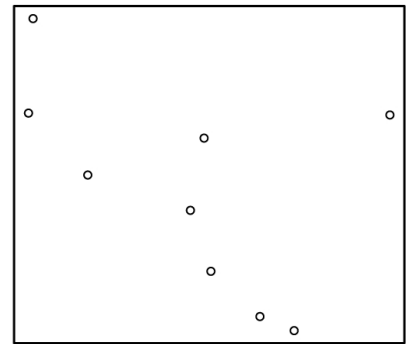

CORNNU (Keir et al. 2011)

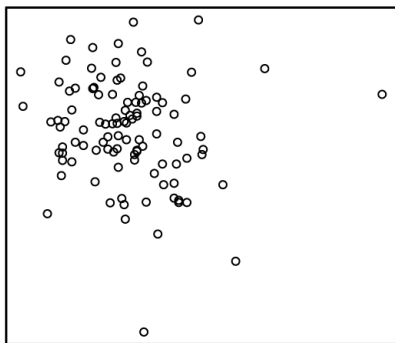

PICEEN (Rehfeldt 1994)

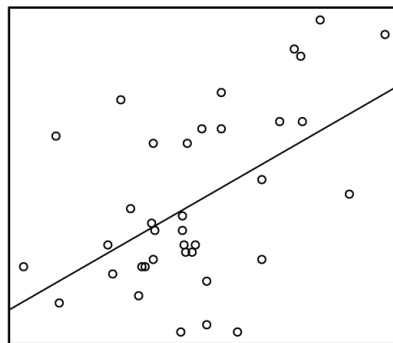

PICEPU (Bongarten 1978)

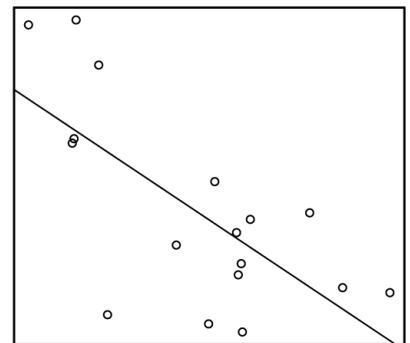

PICESI (Mimura and Aitken 2007)

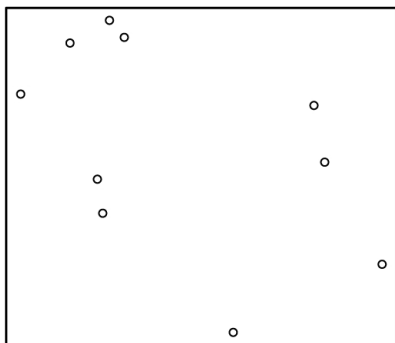

PICESI (Ying 1997)

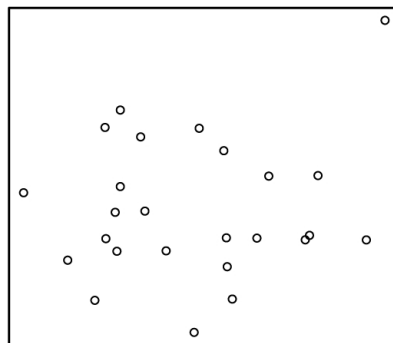

PINUAL (Bower and Aitken 2008)

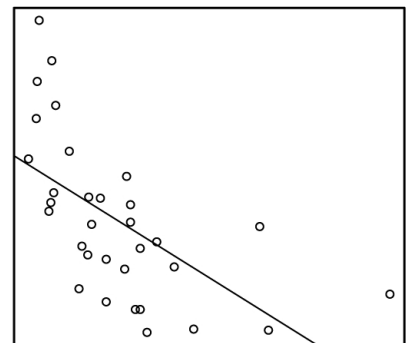

PINUAT (Brown and Doran 1985)

Provenance mean summer precipitation (100 mm)

Standardized height growth potential (%)

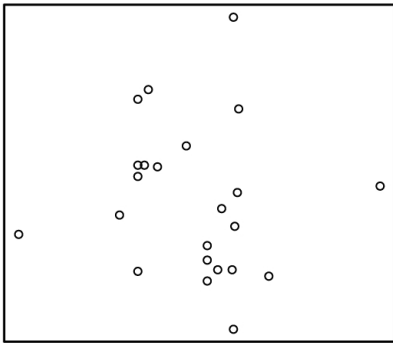

PINUCO (Dow et al. 1998)

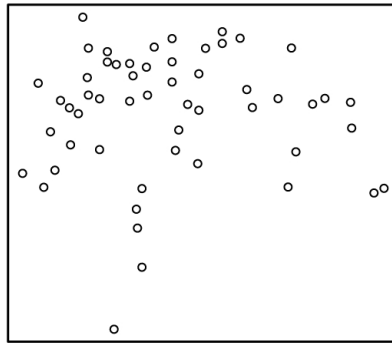

PINUCO (Illingworth 1978)

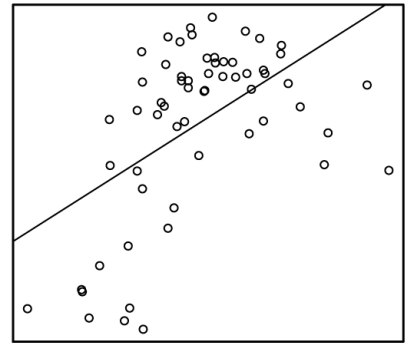

PINUMO (Rehfeldt et al. 1984)

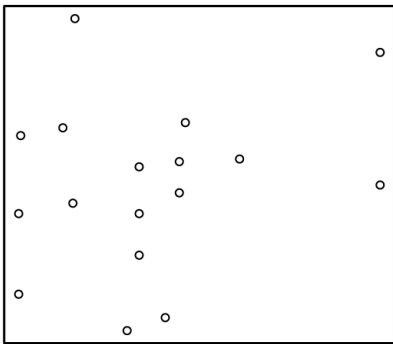

PINUPO (Enricci et al. 2000)

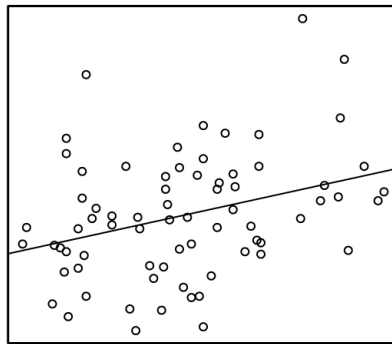

PINUPO (Read 1980)

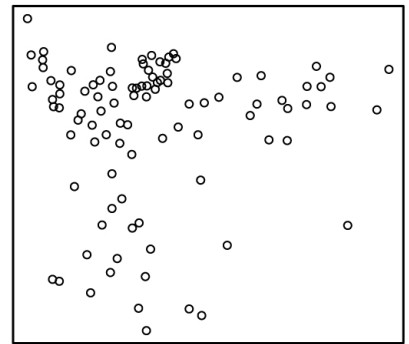

POPUTR (McKown et al. 2013)

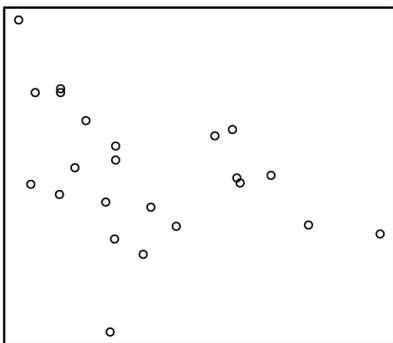

PSEUME (Sweet 1965)

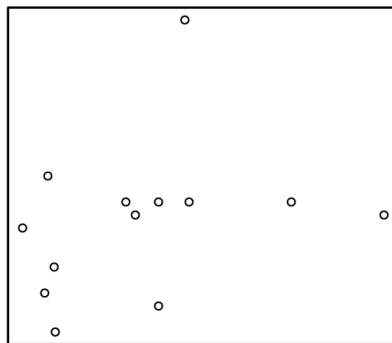

PSEUME (White and Ching 1985)

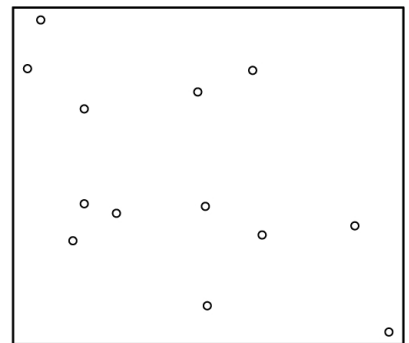

QUERGA (Huebert 2009)

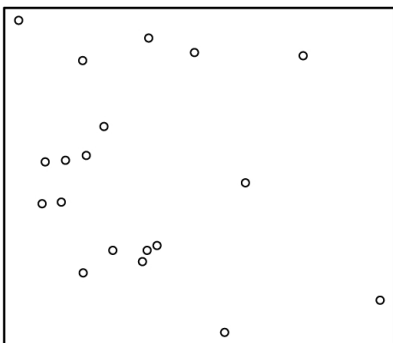

THUJPL (Cherry 1995)

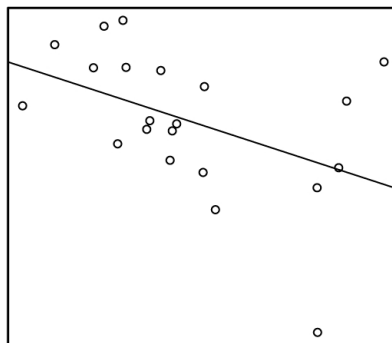

TSUGHE (Kuser and Ching 1981)

Provenance mean summer precipitation (100 mm)

Date of spring event

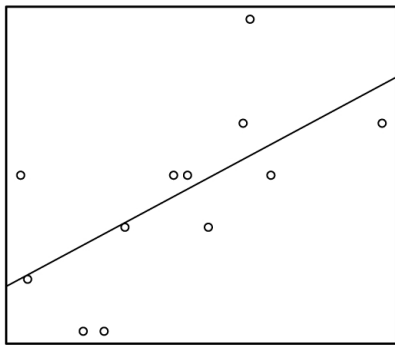

ALNURU (Cannell et al. 1987)

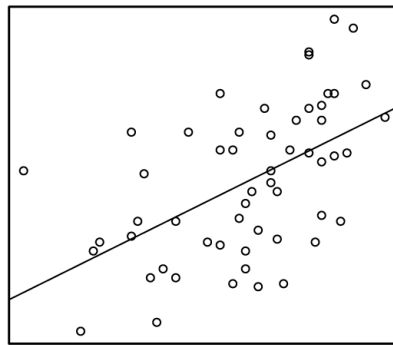

ALNURU (Hamann et al. 1998)

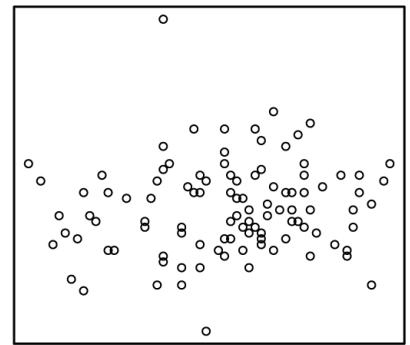

PICEEN (Rehfeldt 1994)

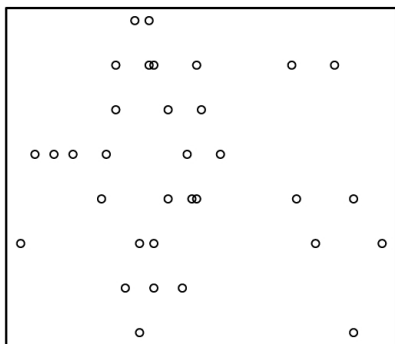

PICEPU (Bongarten 1978)

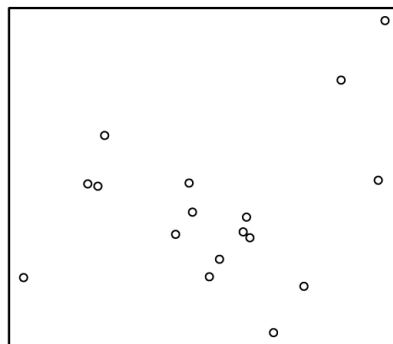

PICESI (Mimura and Aitken 2007)

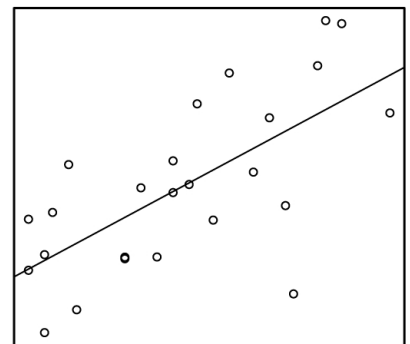

PINUAL (Bower and Aitken 2008)

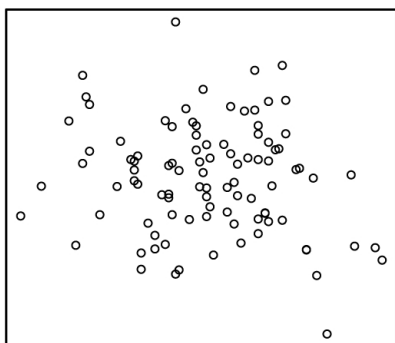

POPUTR (McKown et al. 2013)

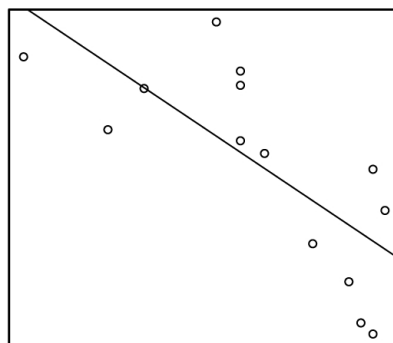

PSEUME (Lavadinović et al. 2013)

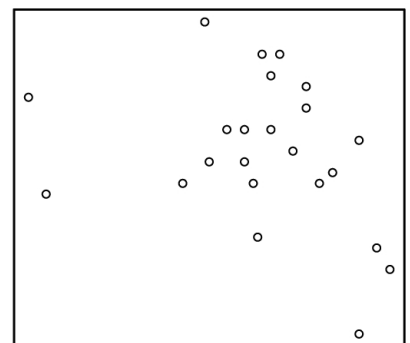

PSEUME (Sweet 1965)

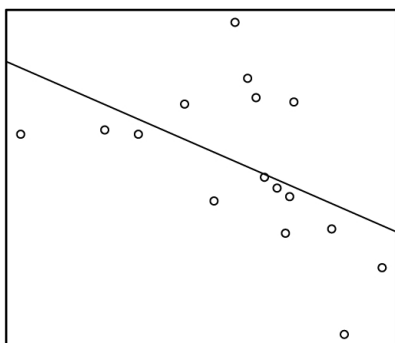

PSEUME (White et al. 1979)

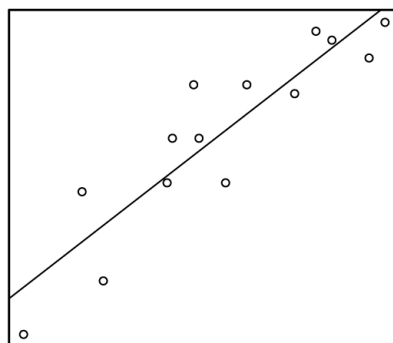

TSUGHE (Kuser 1980)

Provenance mean annual temperature ( $^{\circ}\text{C}$ )

Date of spring event

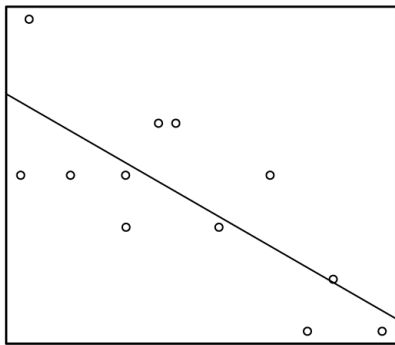

ALNURU (Cannell et al. 1987)

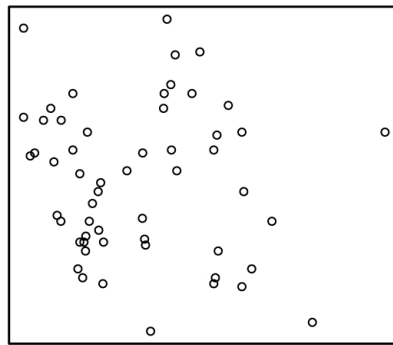

ALNURU (Hamann et al. 1998)

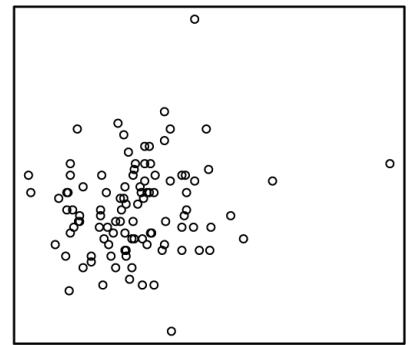

PICEEN (Rehfeldt 1994)

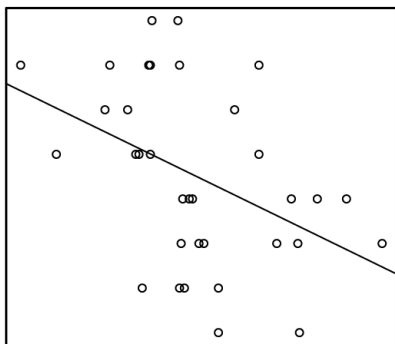

PICEPU (Bongarten 1978)

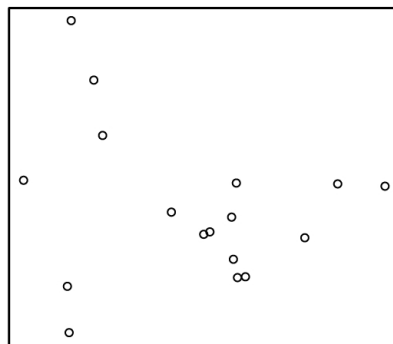

PICESI (Mimura and Aitken 2007)

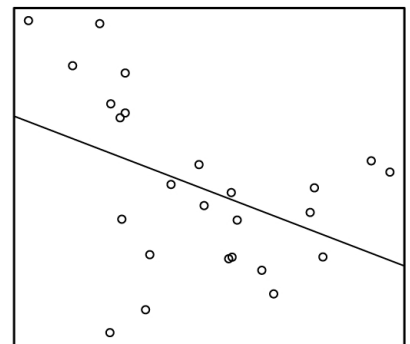

PINUAL (Bower and Aitken 2008)

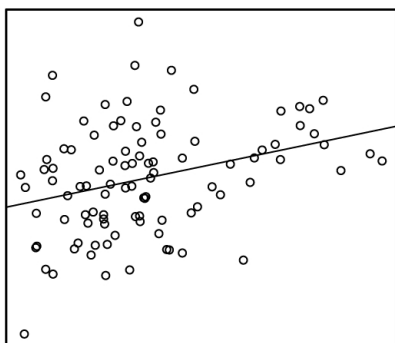

POPUTR (McKown et al. 2013)

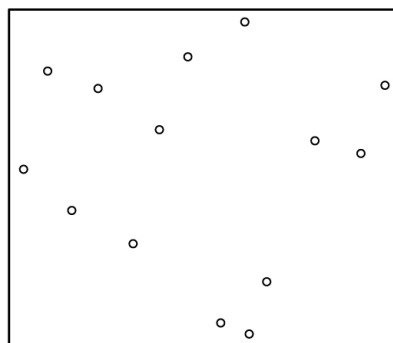

PSEUME (Lavadinović et al. 2013)

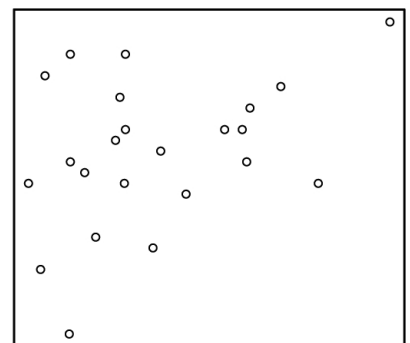

PSEUME (Sweet 1965)

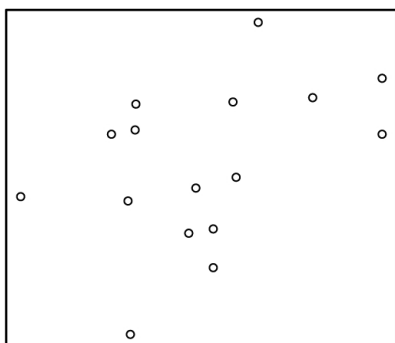

PSEUME (White et al. 1979)

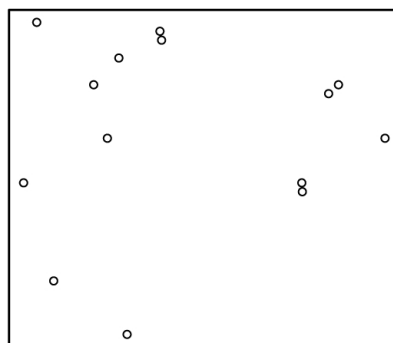

TSUGHE (Kuser 1980)

Provenance mean summer precipitation (100 mm)

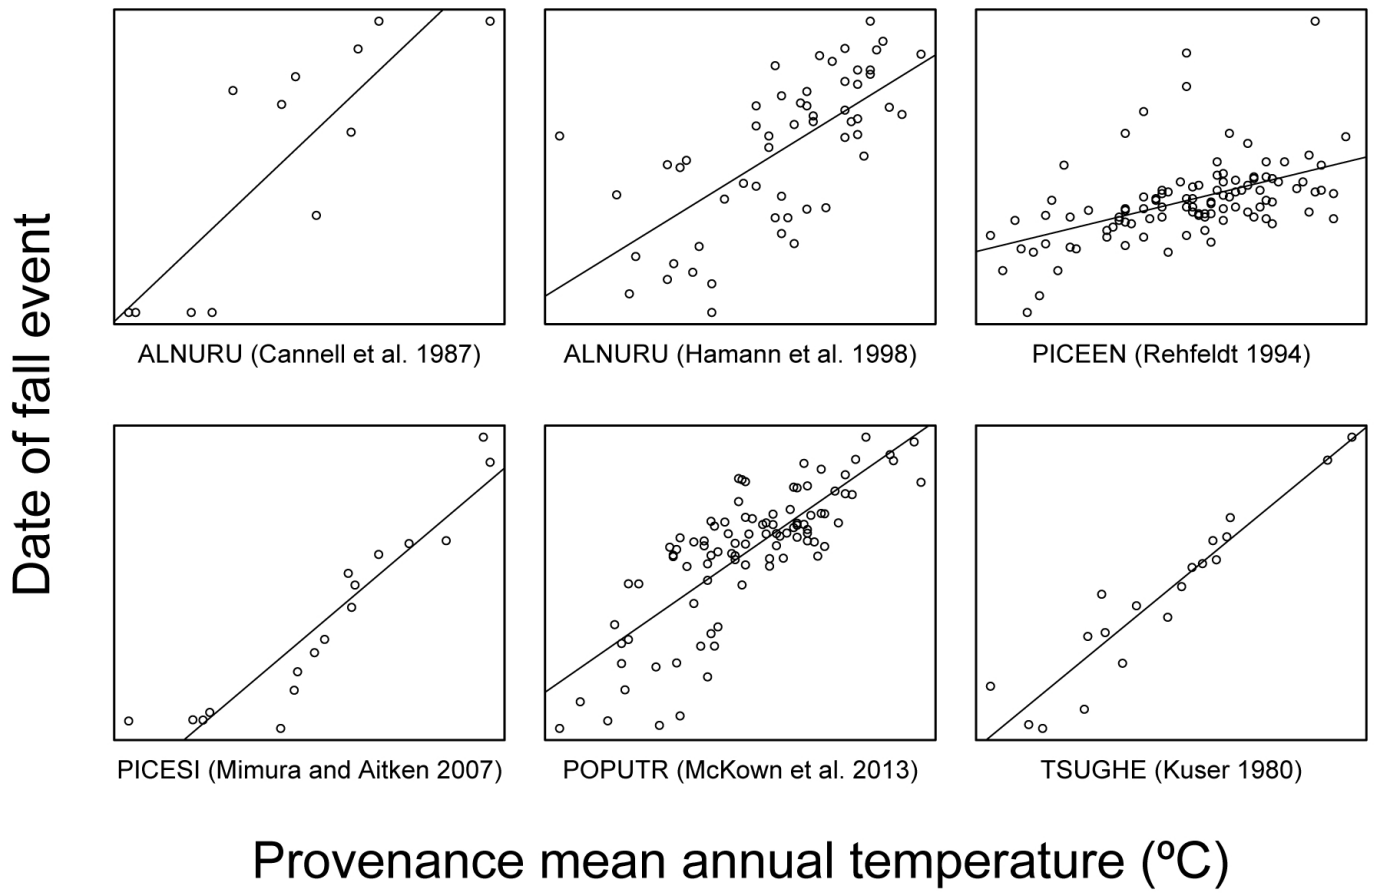

Supplementary Figure 8

Date of fall event

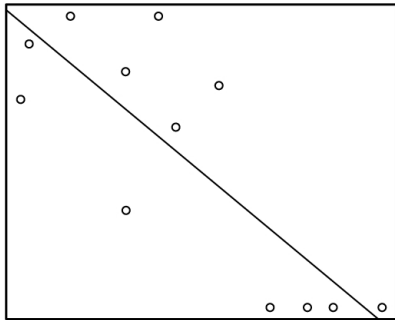

ALNURU (Cannell et al. 1987)

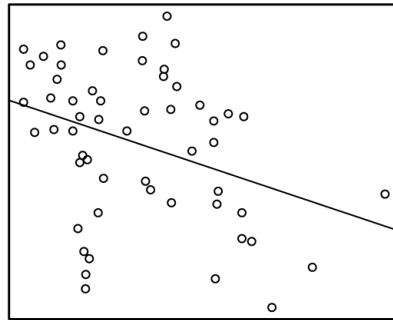

ALNURU (Hamann et al. 1998)

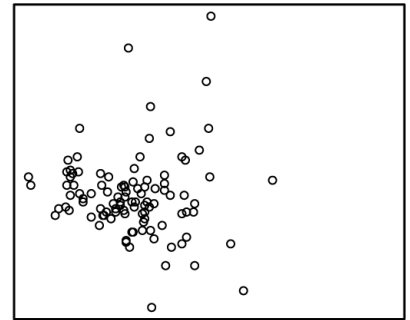

PICEEN (Rehfeldt 1994)

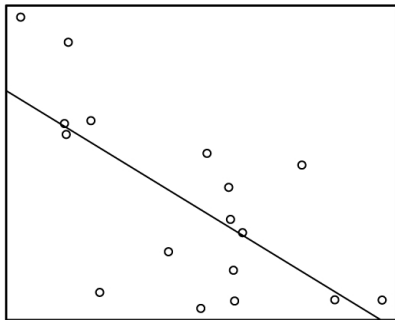

PICESI (Mimura and Aitken 2007)

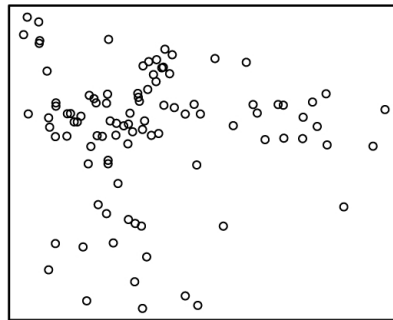

POPUTR (McKown et al. 2013)

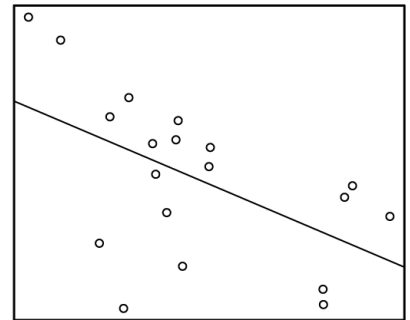

TSUGHE (Kuser 1980)

Provenance mean summer precipitation (100 mm)
